# Supplementary material for: Enhancing catalytic efficiency of carbon dots by modulating their Mn doping and chemical structure with metal salts
Source: Royal Society of Chemistry journal article supplement (doi:10.1039/d3ra01001e), 2023-01-01
Supplement: d3ra01001e1.pdf [file d3ra01001e1.pdf]

## **Enhancing catalytic efficiency of carbon dots by modulating their Mn doping and chemical structure with metal salts**

Wooseok Kang<sup>†</sup>, Ahyun Lee<sup>†</sup>, Yoonjin Tae, ByeongSeung Lee, Jin-sil Choi\*

Department of Chemical and Biological Engineering, Hanbat National University, Daejeon 34158, Korea

E-mail: [jinsil.choi@hanbat.ac.kr](mailto:jinsil.choi@hanbat.ac.kr)

### 1. Analysis of crystal structure of the obtained Mn doped carbon dots (Mn&N-CDs)

The X-ray diffraction (XRD) pattern of Mn&N-CDs was obtained using a MiniFlex benchtop X-ray diffractometer (Rigaku, Japan).

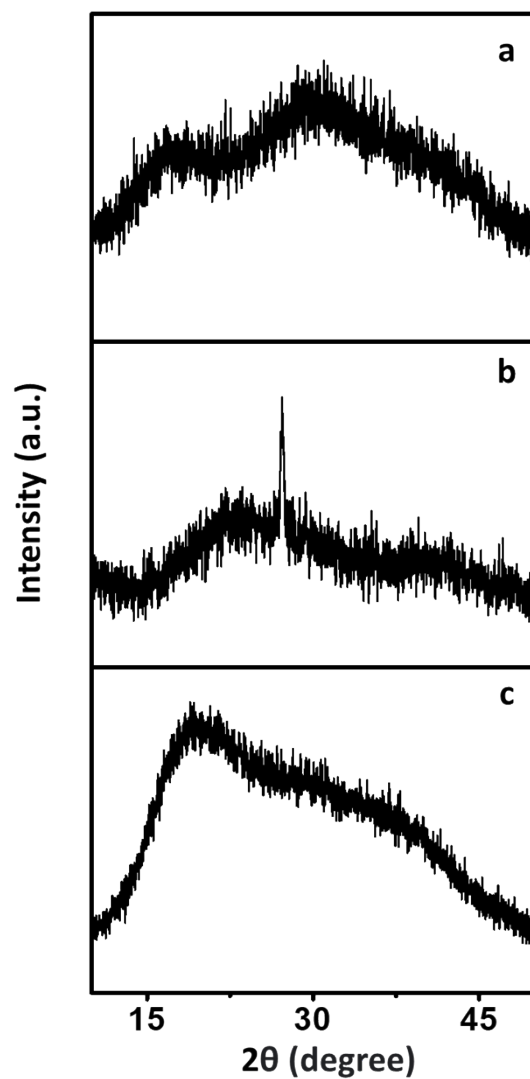

**Figure S1.** XRD spectrum of Mn&N-CDs; (a). Mn&N-CD<sub>Cl</sub>, (b). Mn&N-CD<sub>SO<sub>4</sub></sub>, and (c). Mn&N-CD<sub>NO<sub>3</sub></sub>.

## 2. Comparison of infrared (IR) spectra of N-CD and Mn&N-CDs

The Fourier transform infrared spectra of N-CD and Mn&N-CDs were obtained using a Nicolet 6700 (ThermoFisher Scientific, Waltham, United States).

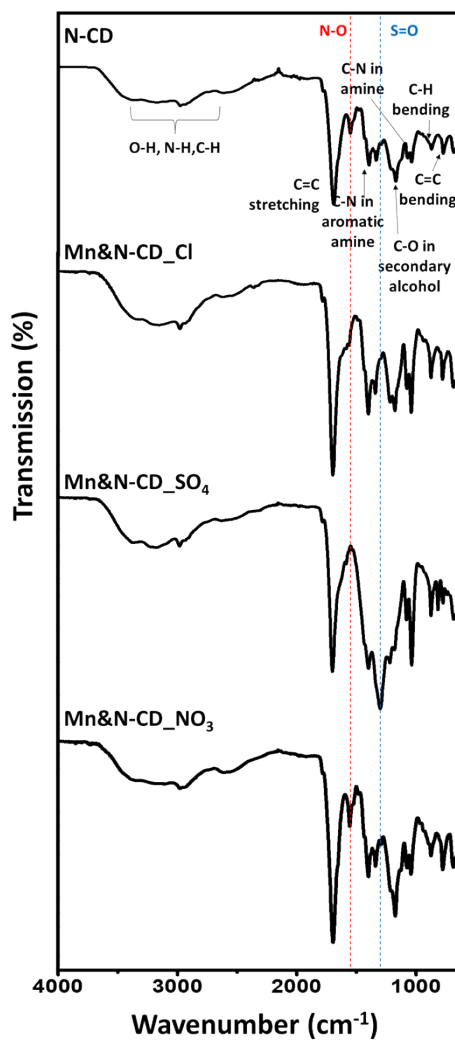

Figure S2. Comparison of IR spectra of N-CD and Mn&N-CDs.

### 3. Comparison of relative atomic compositions of N-CD and Mn&N-CDs using X-ray photoelectron spectrometry (XPS)

The chemical compositions of N-CD and Mn&N-CDs were investigated through XPS (K-Alpha+, ThermoFisher Scientific, USA). The relative contents of each atom were quantified by measuring the peak area in the survey scan spectra and high-resolution spectra of each atom shown in Figure 2.

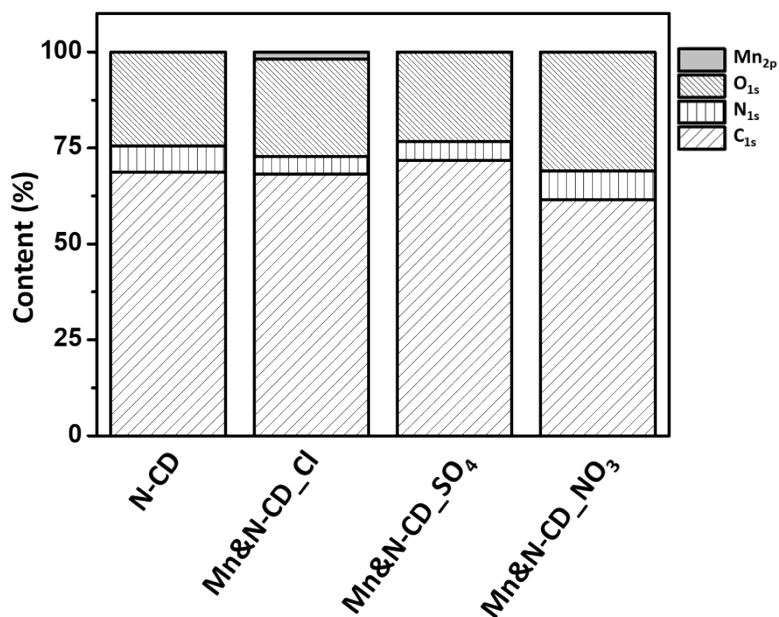

Figure S3. Ratios of each component in N-CD and Mn&N-CDs, which are based on XPS peak area.

#### 4. Analysis of the content of Mn ions in Mn&N-CDs using inductively coupled plasma-mass spectrometry (ICP-MS)

The amounts of Mn ions in three batches of Mn&N-CDs were analyzed using ICP-MS (NEXION-350X, PerkinElmer, USA).

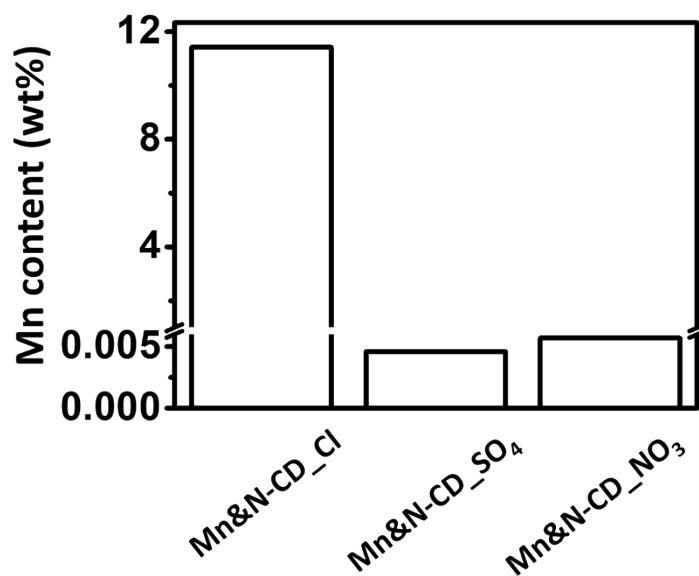

Figure S4. Mn contents in Mn&N-CDs.

## 5. Evaluation of the synergistic catalytic effect of Mn&N-CD\_Cl

The enzymatic activity of Mn&N-CD\_Cl has been compared to N-CD and MnCl<sub>2</sub> mixture at pH 2. Mn&N-CD\_Cl showed high enzymatic activity while N-CD and MnCl<sub>2</sub> mixture exhibited no recognizable color change.

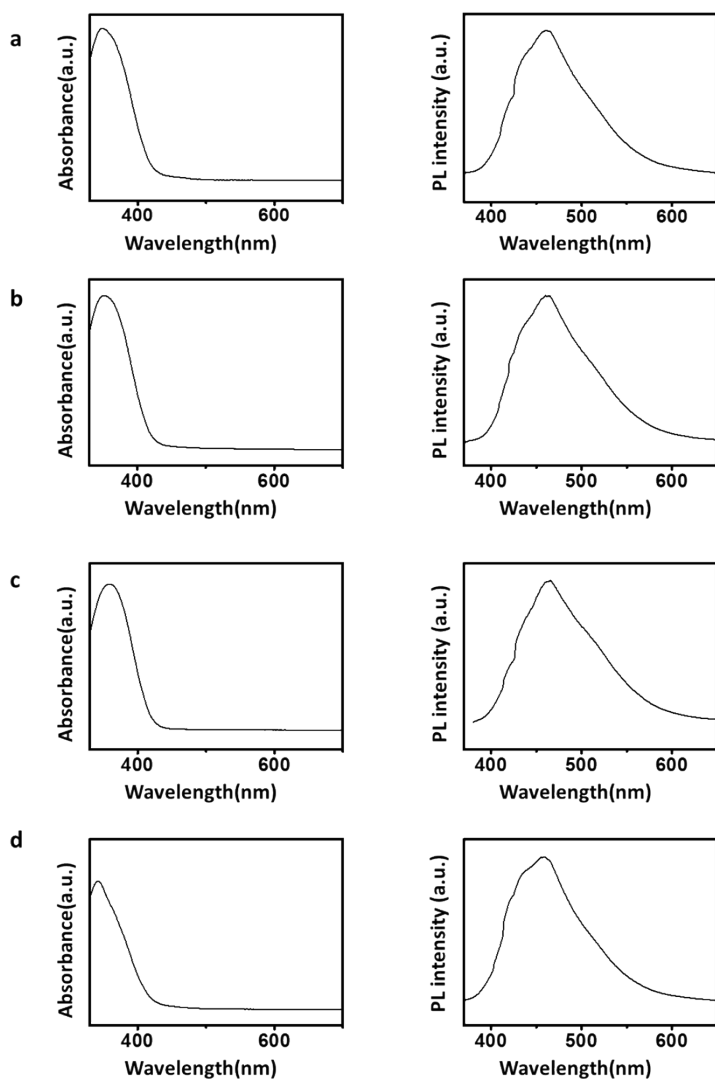

**Figure S5.** Absorption and emission spectra of (a) N-CD, (b) Mn&N-CD\_Cl, (c) Mn&N-CD\_SO<sub>4</sub>, and (d) Mn&N-CD\_NO<sub>3</sub> samples.

## 6. Photostability of Mn&N-CDs

The photostability of the Mn&N-CD was examined with light exposure. Aqueous suspensions containing Mn&N-CDs were exposed to daylight for 70 h, and their fluorescence intensity at 450 nm ( $\lambda_{\text{ex}}$ : 350 nm) was measured using a fluorometer. Then, the enzyme-mimicking activities of Mn&N-CDs were monitored using  $\text{H}_2\text{O}_2$  and TMB solution.

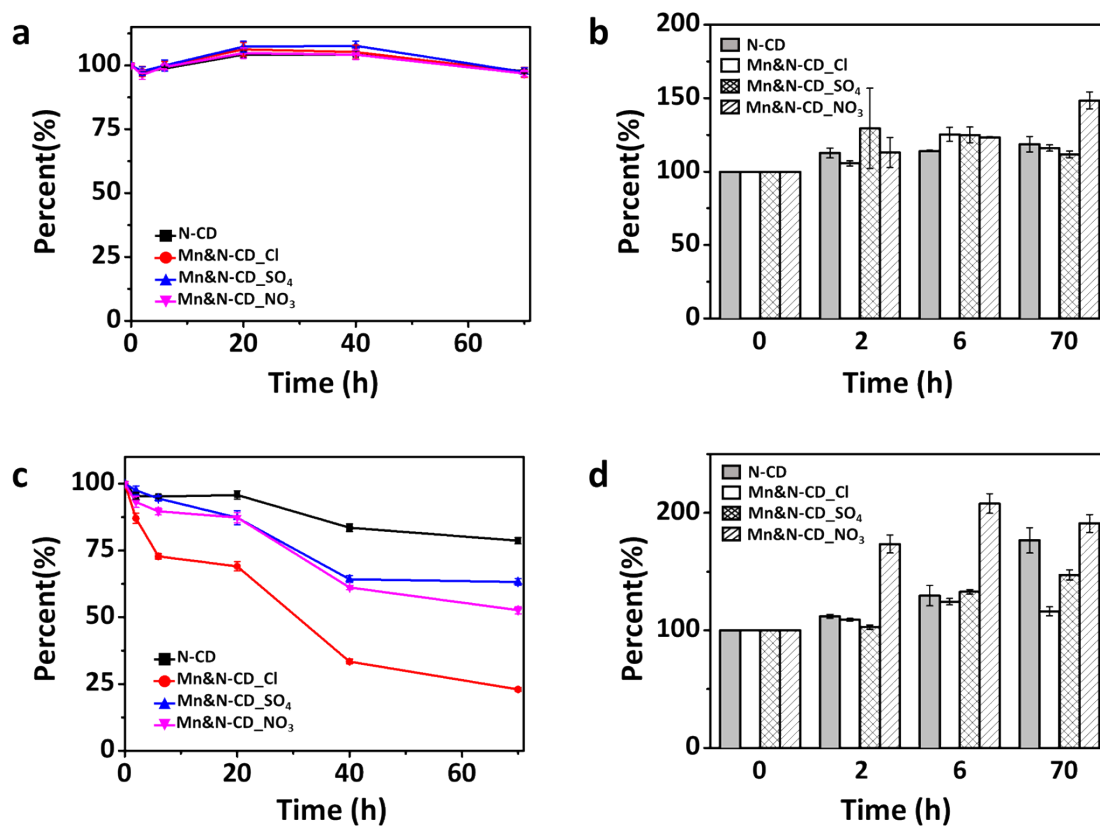

**Figure S6.** Time-dependent fluorescence intensities ( $\lambda_{\text{ex}}$ : 350 nm,  $\lambda_{\text{em}}$ : 450 nm; a and c) and catalytic properties (b and d) of N-CDs and Mn&N-CDs which stored in amber (a and b) and transparent (c and d) vials under exposure to daylight.

### 7. Evaluation of the synergistic catalytic effect of Mn&N-CD\_Cl

The enzymatic activity of Mn&N-CD\_Cl was compared to that of a mixture of N-CD and MnCl<sub>2</sub> at pH 2. To assess the activity levels, the color change of the solutions was monitored after adding N-CD (0.5 mg/ml), N-CD (0.5 mg/ml) and MnCl<sub>2</sub> (1.0 mM) mixture, and Mn&N-CD\_Cl (0.5 mg/ml) to solutions containing H<sub>2</sub>O<sub>2</sub> (100.0 mM) and TMB (10.0 mM). Notably, the solution containing Mn&N-CD\_Cl exhibited a strong blue color, indicating high enzymatic activity, whereas the N-CD and MnCl<sub>2</sub> mixture showed no recognizable color change like N-CD.

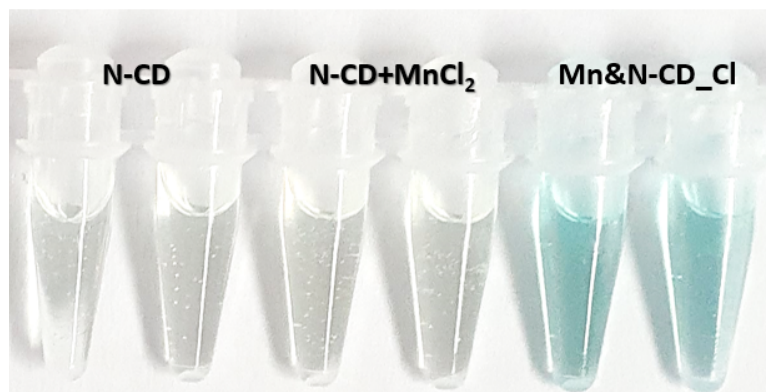

**Figure S7.** Photograph of solutions containing H<sub>2</sub>O<sub>2</sub> and TMB with N-CD, N-CD and MnCl<sub>2</sub> mixture, and Mn&N-CD\_Cl, respectively.



## 8. AA detection capability at different Mn source

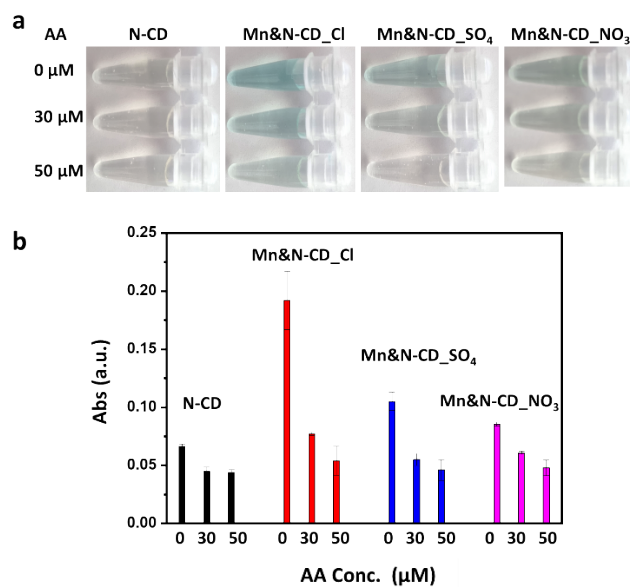

**Figure S8.** (a) Photograph and (b) absorption intensity of mixture solutions of  $\text{H}_2\text{O}_2$ , TMB, and Mn&N-CDs with AA in different concentrations.
